# Supplementary material for: Surfactant effects on electrochemically durable lead halide perovskite electro-catalysts
Source: Royal Society of Chemistry journal article supplement (doi:10.1039/d2dt03868d), 2023-01-01
Supplement: d2dt03868d1.pdf [file d2dt03868d1.pdf]

# Electronic Supplementary Information

## Surfactant Effects on the Electrochemical-durable Lead Halide Perovskite Electro-catalysts

Ren-Jun Zhong,<sup>a,+</sup> Kai-Wei Tsao,<sup>a,+</sup> Chun-Hao Cheng,<sup>b</sup>

Cheng-Chan Liu,<sup>a</sup> and Chun-Ting Li<sup>a\*</sup>

*<sup>a</sup>Department of Chemistry, National Taiwan Normal University, Taipei  
11677, Taiwan. <sup>b</sup>Department of Chemistry, National Taiwan University,  
Taipei 10617, Taiwan*

\*Corresponding author: Tel.: +886–2–7749–6146;

Fax: +886–2–2932–4249; E-mail: [ctli@gapps.ntnu.edu.tw](mailto:ctli@gapps.ntnu.edu.tw)

## 1. Materials

*N,N*-Dimethylformamide (DMF,  $\geq 99.8\%$ ), titanium (IV) isopropoxide (TTIP,  $> 98\%$ ), ethanol (EtOH,  $99.5\%$ ), isopropyl alcohol (IPA,  $99.5\%$ ), 2-methoxyethanol ( $\geq 99.5\%$ ), methylammonium iodide (MAI,  $98\%$ ), 1-propyl-3-methylimidazolium iodide (PMII), and tetrahexylammonium chloride (THA-Cl,  $96\%$ ) were obtained from Sigma Aldrich. Lithium iodide (LiI, synthetic grade), iodine ( $I_2$ , synthetic grade), and poly(ethylene glycol) (PEG, MW $\sim$ 20,000) were purchased from Merck. Acetone ( $99\%$ ), guanidinium thiocyanate (GuSCN,  $\geq 99\%$ ), 4-*tert*-butylpyridine (tBP,  $96\%$ ), lead(II) iodide ( $PbI_2$ ,  $99\%$ ), tetrabutylammonium iodide (TBA-I,  $98\%$ ), tetrahexylammonium bromide (THA-Br,  $99\%$ ), and *tert*-butyl alcohol (tBA,  $96\%$ ) were bought from Acros. 3-Methoxypropionitrile (MPN,  $99\%$ ), cesium iodide (CsI,  $99.9\%$ ), germanium(II) iodide ( $GeI_2$ ,  $99.99\%$ ), tetrabutylammonium hexafluorophosphate ( $TBAPF_6$ ), and tetraethylammonium iodide (TEA-I,  $98\%$ ) were procured from Alfa Aesar. 1,2-Dimethyl-3-propylimidazolium iodide (DMPII), formamidinium iodide (FAI,  $99\%$ ), and tetra-*n*-octylammonium iodide (TOA-I,  $> 98\%$ ) were procured from Tokyo Chemical Industry Co., Ltd. Transparent  $TiO_2$  paste (Ti-nanoxide HT/SP, average diameter of 20 nm) and cis-diisothiocyanato-bis(2,2'-bipyridyl-4,4'-dicarboxylato) ruthenium (II) bis(tetrabutylammonium) (N719 dye) were supplied by Solaronix, S.A., Aubonne, Switzerland. Acetonitrile (MeCN,  $99.99\%$ ) and dichloromethane (DCM,  $\geq 99.8\%$ ) were received from J. T. Baker. The commercial light scattering  $TiO_2$  particles, ST-41 with an averaged diameter of 200 nm, were obtained from Ishihara Sangyo, Ltd. Fluorine-doped tin oxide (FTO, TEC7,  $7 \Omega \text{ sq.}^{-1}$ ) conducting glass was purchased from NSG America, Inc., New Jersey, USA. Nickel foam (NF, 100PPI, thickness = 1.7 mm) was bought from Fucell Co., Ltd., Taiwan.

## 2. Fabrication of the DSSCs

Conducting substrate, FTO and carbon cloth, were cleaned with a neutral cleaner and then washed with de-ionized water, acetone, and isopropanol sequentially. A mesoporous  $TiO_2$  photoanode (with an working area of  $0.20 \text{ cm}^2$ ) was coated on a cleaned FTO by the following procedures. (1) The first  $TiO_2$  compact layer ( $\sim 100 \text{ nm}$ ) was spin-coated on FTO under 3000 rpm for 30 s using a precursor solution of TTIP/2-methoxyethanol with a weight ratio of 1/3. (2) The second  $TiO_2$  transparent layer ( $\sim 10 \mu\text{m}$ ) was doctor-bladed onto the first layer using the commercial TL paste purchased from Solarnix. (3) The third  $TiO_2$  scattering layer ( $\sim 4 \mu\text{m}$ ) was doctor-bladed onto the second layer using a reported home-made paste<sup>1</sup>. (4) Last, the  $TiO_2$  thin film was treated by a 70 mM of  $TiCl_4$  solution (with a solvent) at  $70 \text{ }^\circ\text{C}$  for 30 min in a mixing solvent of deionc water/ethanol (v/v=9/1). The  $TiO_2$  layer made by every step would be followed by a sintering process at  $500 \text{ }^\circ\text{C}$  for 30 min in an ambient atmosphere. After the sintering process, the  $TiO_2$  photoanode was immersed in a  $5.0 \times 10^{-4} \text{ M}$  N719 dye solution using a mixed solvent of MeCN/tBA with a volume ratio of 1:1 at room temperature for 24 h. A  $TiO_2$  photoanode was coupled with a counter electrode made by this work. And the cell gap was maintained by using a  $60 \mu\text{m}$ -thick Surlyn<sup>®</sup> film as the spacer.

### 3. Material characterizations

Crystallinity and molecular structure of as-synthesized Cu-MOF particle were analyzed by powder X-ray diffraction pattern spectroscopy (PXRD, Rigaku, Tokyo, Japan) and X-ray photoelectron spectroscopy (XPS, Thermo Scientific Theta Probe, UK), respectively. The thin film morphology was observed by field-emission scanning electron microscopy (FE-SEM, Nova NanoSEM 230, FEI, Oregon, USA).

### 4. Photovoltaic performance measurement

Photovoltaic parameters of the DSSCs with different counter electrodes were obtained by a potentiostat/galvanostat (Metrohm Autolab PGSTAT204, Autolab, Eco-Chemie, the Netherlands) at the simulated solar irradiation ( $100 \text{ mW cm}^{-2}$ , AM 1.5G) and Philip T5 lamp illumination (6000, 3000, and 1000 lux). The simulated solar irradiation was performed by a class A quality solar simulator (PEC-L11, AM1.5G, Peccell Technologies, Inc., Kanagawa, Japan). The incident light intensity was calibrated by a standard Si cell (PECSI01, Peccell Technologies, Inc.) and by an optical detector (model 818-SL, Newport, California, USA) coupled with a power meter (model 1916-R, Newport, California, USA). The DSSC device was composed of a sandwich structure of photoanode/ electrolyte/ counter electrode; where an identical  $\text{TiO}_2$  film adsorbed with N719 sensitizer was the photoanode, an liquid iodide-based mixture was the electrolyte, and the different electrodes made by this work were used as the counter electrodes. Here, the iodide-based electrolyte contained 1.2 M DMPII, 0.035 M  $\text{I}_2$ , 0.1 M GuSCN, and 0.5 M tBP in MPN/MeCN (volume ratio of 1:4) and was injected into the gap between photoanode and counter electrode by capillarity.

### 5. Four-point probe and electrochemical measurements

Four-point probe measurement were recorded by a Keithley's instrument (Keithley 2450 – SourceMeter Instrument, Keithley Instruments Inc., USA) by using the different electrodes made by this work. Tafel polarization plots and electrochemical impedance spectra (EIS) analyses were recorded a potentiostat/galvanostat (Metrohm Autolab PGSTAT204, Autolab, Eco-Chemie, the Netherlands) using a symmetrical cell structure of electrode/electrolyte/electrode; where an electrode made by this work was applied for both anode and cathode. The electrolyte for Tafel and EIS analyses contained 1.2 M DMPII, 0.035 M  $\text{I}_2$ , 0.1 M GuSCN, and 0.5 M tBP in MPN/MeCN (volume ratio of 1:4). For Tafel plots, linear sweep voltammetry (LSV) was performed from 1 V to -1 V at the scan rate of  $50 \text{ mV s}^{-1}$ . For EIS analysis, the data was collected using a FRA2 module between 10 mHz to 65 kHz with an AC amplitude of  $\pm 10 \text{ mV}$ . CV analysis was executed by a potentiostat/galvanostat (Metrohm Autolab PGSTAT204, Autolab, Eco-Chemie, the Netherlands) using a three-electrode system. The sample electrode was used as the working electrode. A Pt foil and Ag/AgNO<sub>3</sub> electrodes were used as the counter and reference electrode, respectively. A dilute iodide-based electrolyte, containing 10 mM of 1-propyl-3-methylimidazolium iodide (PMII), 1 mM of iodine ( $\text{I}_2$ ), and 0.1 M of tetrabutylammonium hexafluorophosphate (TBAPF<sub>6</sub>) in dichloromethane (DCM), was used.

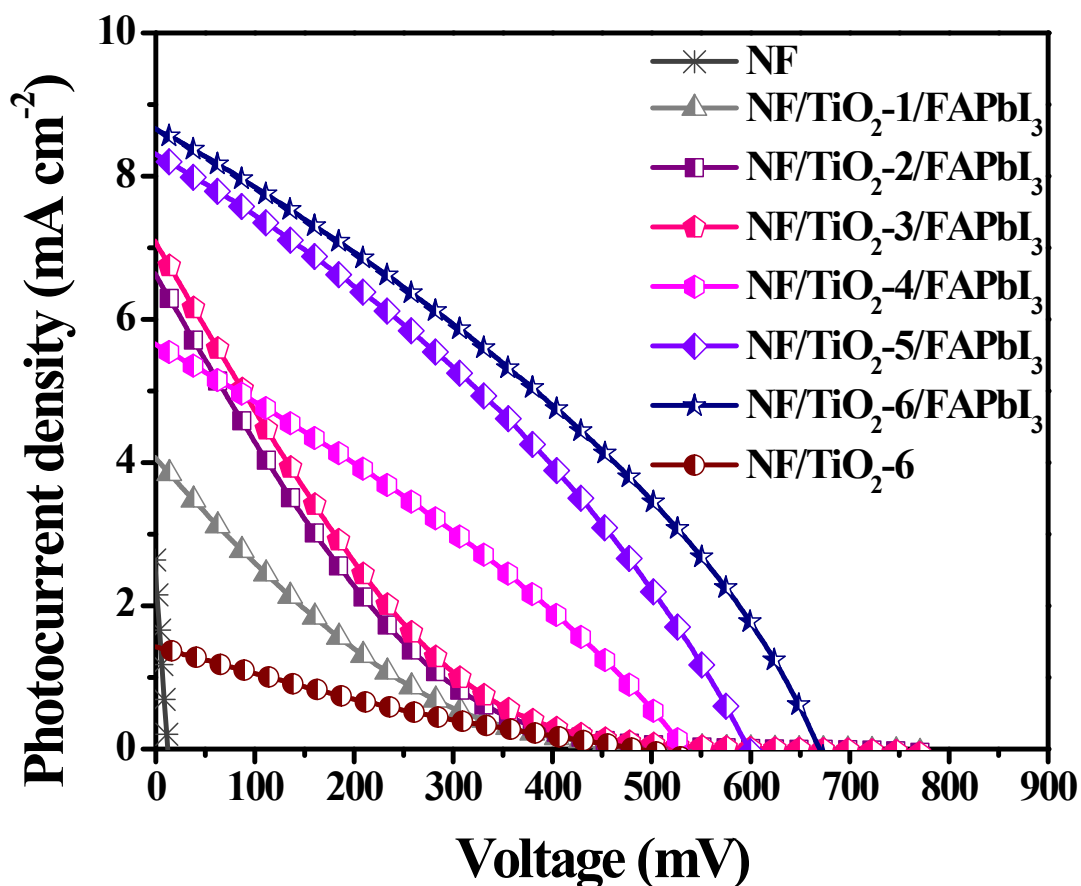

**Fig. S1** Photocurrent density–voltage curves of DSSCs with counter electrodes of raw NF, different NF/TiO<sub>2</sub>-*x*/FAPbI<sub>3</sub>, (*x* = 1 to 6), and NF/TiO<sub>2</sub>-6, measured at a simulated AM 1.5G.

**Table S1** Photovoltaic parameters of the DSSCs with counter electrodes of raw NF, different NF/TiO<sub>2</sub>-*x*/FAPbI<sub>3</sub>, (*x* = 1 to 6), and NF/TiO<sub>2</sub>-6, measured at a simulated AM 1.5G. The statistical data were based on five independent measurements.

| Counter electrode                         | $\eta$ (%) | $V_{OC}$ (V) | $J_{SC}$ (mA cm <sup>-2</sup> ) | $FF$      |
|-------------------------------------------|------------|--------------|---------------------------------|-----------|
| NF                                        | 0.01±0.00  | 0.01±0.01    | 2.80±0.2                        | 0.24±0.00 |
| NF/TiO <sub>2</sub> -1/FAPbI <sub>3</sub> | 0.29±0.05  | 0.61±0.06    | 4.10±0.2                        | 0.12±0.00 |
| NF/TiO <sub>2</sub> -2/FAPbI <sub>3</sub> | 0.48±0.05  | 0.63±0.07    | 6.60±0.3                        | 0.11±0.00 |
| NF/TiO <sub>2</sub> -3/FAPbI <sub>3</sub> | 0.50±0.03  | 0.64±0.04    | 6.50±0.1                        | 0.12±0.00 |
| NF/TiO <sub>2</sub> -4/FAPbI <sub>3</sub> | 0.89±0.05  | 0.53±0.09    | 5.60±0.3                        | 0.30±0.00 |
| NF/TiO <sub>2</sub> -5/FAPbI <sub>3</sub> | 1.62±0.04  | 0.60±0.05    | 8.00±0.2                        | 0.34±0.00 |
| NF/TiO <sub>2</sub> -6/FAPbI <sub>3</sub> | 1.90±0.03  | 0.66±0.05    | 8.70±0.2                        | 0.33±0.00 |
| NF/TiO <sub>2</sub> -6                    | 0.13±0.01  | 0.49±0.07    | 1.40±0.3                        | 0.20±0.01 |

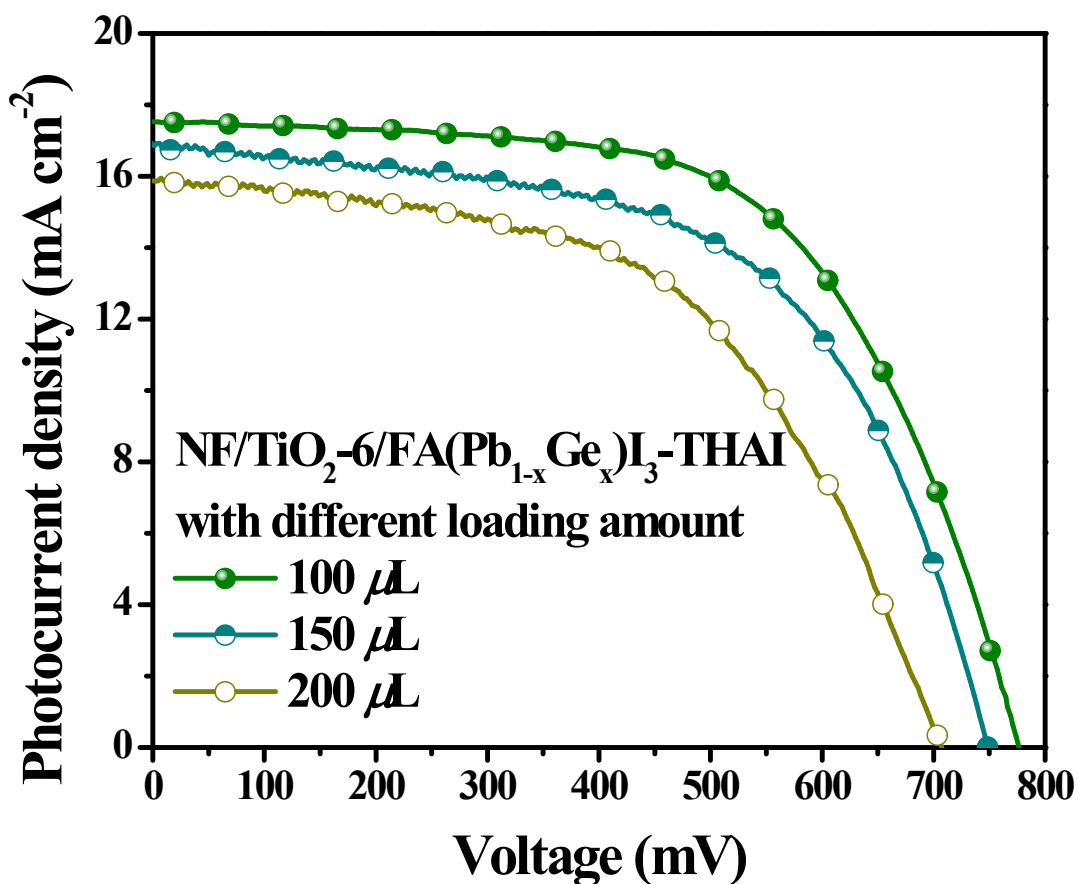

**Fig. S2** Photocurrent density–voltage curves of DSSCs with the counter electrodes of different NF/TiO<sub>2</sub>-6/FA(Pb<sub>1-x</sub>Ge<sub>x</sub>)I<sub>3</sub>-THAI prepared by different loading amount of precursor, measured at a simulated AM 1.5G.

**Table S2** Photovoltaic parameters of the DSSCs with the counter electrodes of different NF/TiO<sub>2</sub>-6/FA(Pb<sub>1-x</sub>Ge<sub>x</sub>)I<sub>3</sub>-THAI prepared by different loading amount of precursor, measured at a simulated AM 1.5G. The statistical data were based on five independent measurements.

| NF/TiO <sub>2</sub> -6/FA(Pb <sub>1-x</sub> Ge <sub>x</sub> )I <sub>3</sub> -THAI<br>Counter electrode | $\eta$<br>(%) | $V_{oc}$<br>(V) | $J_{sc}$<br>(mA cm <sup>-2</sup> ) | $FF$        |
|--------------------------------------------------------------------------------------------------------|---------------|-----------------|------------------------------------|-------------|
| 100 $\mu\text{L}$                                                                                      | 8.31 ± 0.31   | 0.77 ± 0.01     | 17.69 ± 0.36                       | 0.61 ± 0.01 |
| 150 $\mu\text{L}$                                                                                      | 7.15 ± 0.28   | 0.75 ± 0.02     | 17.23 ± 0.11                       | 0.57 ± 0.01 |
| 200 $\mu\text{L}$                                                                                      | 6.27 ± 0.41   | 0.72 ± 0.02     | 15.94 ± 0.43                       | 0.55 ± 0.02 |

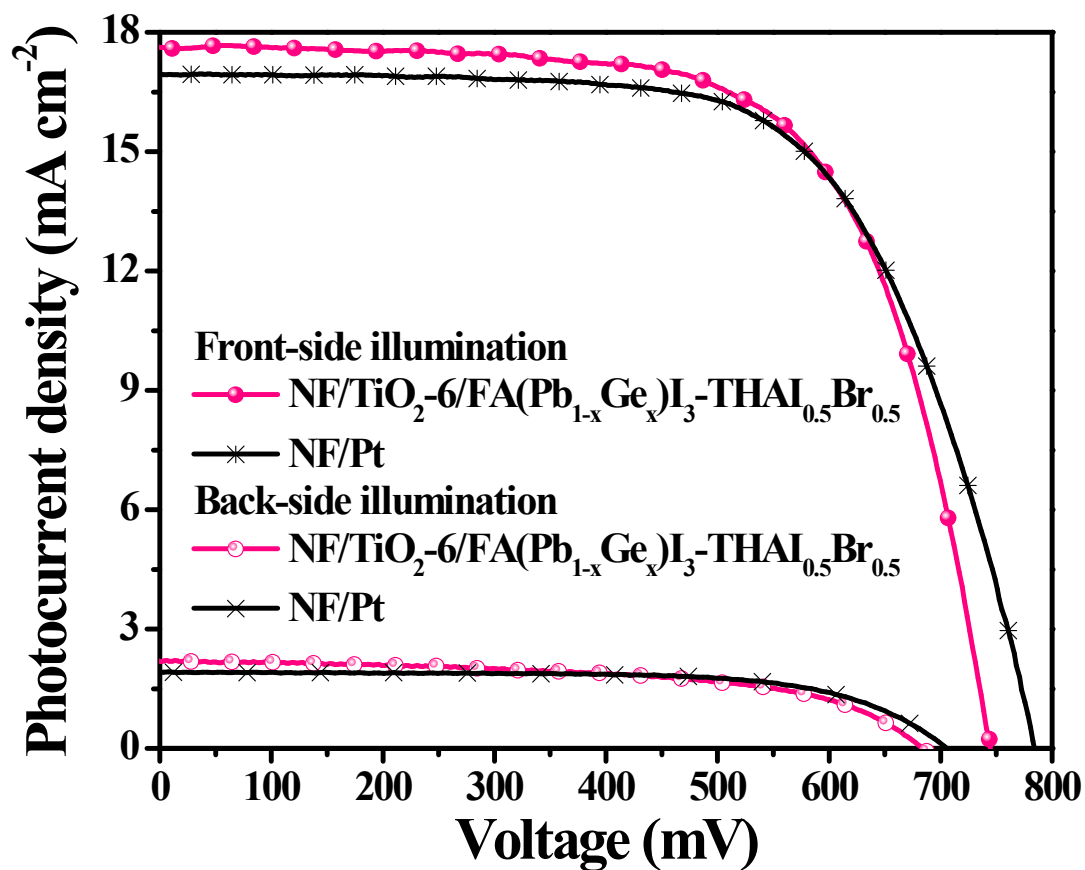

**Fig. S3** Photocurrent density–voltage curves of DSSCs with the counter electrodes of NF/Pt and NF/TiO<sub>2</sub>-6/FA(Pb<sub>1-x</sub>Ge<sub>x</sub>)I<sub>3</sub>-THAI<sub>0.5</sub>Br<sub>0.5</sub>, measured at a simulated AM 1.5G illumination from the front-side and back-side.

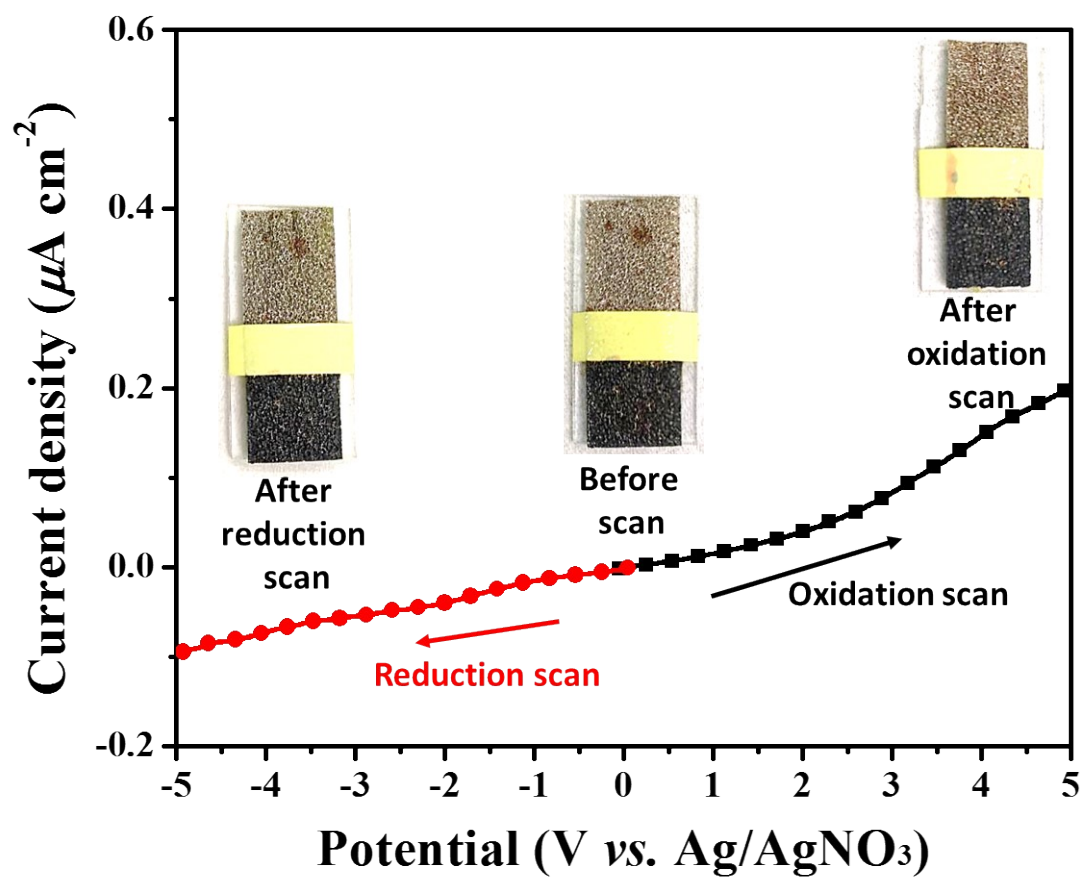

**Fig. S4** Linear sweep voltammograms of NF/TiO<sub>2</sub>-6/FA(Pb<sub>1-x</sub>Ge<sub>x</sub>)I<sub>3</sub>-THAI<sub>0.5</sub>Br<sub>0.5</sub>, measured under a oxidation scan (black square) and a reduction scan (red circle) at a scan rate of 10 mV s<sup>-1</sup> (duration of 500 s).
